# Supplementary material for: Adsorption properties of CH4 and CO2 in quartz nanopores studied by molecular simulation
Source: Royal Society of Chemistry journal article supplement (doi:10.1039/c6ra05083b), 2016-01-01
Supplement: c6ra05083b1.pdf [file c6ra05083b1.pdf]

## Supporting information

### Adsorption properties of CH<sub>4</sub> and CO<sub>2</sub> in quartz nanopores studied by molecular simulation

Haoyang Sun,<sup>a</sup> Wenchao Sun,<sup>b</sup> Hui Zhao,<sup>a</sup> Yange Sun,<sup>a</sup> Dianrui Zhang,<sup>a</sup> Xiaoqing Qi,<sup>a</sup>  
and Ying Li\*,<sup>a</sup>

<sup>a</sup>Key Laboratory of Colloid and Interface Chemistry of State Education  
Ministry, Shandong University, Jinan, Shandong 250100, P. R. China

<sup>b</sup>School of Petroleum Engineering, China University of petroleum (East China),  
Qingdao, Shandong 266580, P. R. China

#### Corresponding author:

Ying Li

[Tel:\(86\) 0531-88362078](tel:(86)0531-88362078)

[Fax: \(86\) 0531-88364464](tel:(86)0531-88364464)

Email: [yingli@sdu.edu.cn](mailto:yingli@sdu.edu.cn)

Table S1. Parameters of the Langmuir isotherms model of pure CH<sub>4</sub> in nanopore

| Temperature<br>(K) | Langmuir constants    |                       | correlation coefficient<br>(R <sup>2</sup> ) |
|--------------------|-----------------------|-----------------------|----------------------------------------------|
|                    | $V_L$<br>(N/nanopore) | $b$<br>(1/kPa)        |                                              |
| 313                | 75.12                 | $9.39 \times 10^{-5}$ | 0.9997                                       |
| 323                | 74.03                 | $8.44 \times 10^{-5}$ | 0.9998                                       |
| 333                | 73.88                 | $1.10 \times 10^{-4}$ | 0.9995                                       |
| 353                | 71.95                 | $7.05 \times 10^{-5}$ | 0.9994                                       |
| 373                | 69.16                 | $6.19 \times 10^{-5}$ | 0.9996                                       |

Table S2. Parameters of the Langmuir isotherms model of pure CO<sub>2</sub> in nanopore

| Temperature<br>(K) | Langmuir constants    |                       | correlation coefficient<br>(R <sup>2</sup> ) |
|--------------------|-----------------------|-----------------------|----------------------------------------------|
|                    | $V_L$<br>(N/nanopore) | $b$<br>(1/kPa)        |                                              |
| 303                | 95.48                 | $8.25 \times 10^{-4}$ | 0.9989                                       |
| 313                | 94.87                 | $6.18 \times 10^{-4}$ | 0.9993                                       |
| 323                | 93.81                 | $4.86 \times 10^{-4}$ | 0.9988                                       |
| 333                | 91.61                 | $4.25 \times 10^{-4}$ | 0.9981                                       |
| 353                | 90.23                 | $2.87 \times 10^{-4}$ | 0.9994                                       |
| 373                | 89.55                 | $1.97 \times 10^{-4}$ | 0.9980                                       |
